# Supplementary material for: Efficient multicolor and white light emission from Zr-based MOF composites: spectral and dynamic properties
Source: Royal Society of Chemistry journal article supplement (doi:10.1039/c5tc02357b), 2015-01-01
Supplement: c5tc02357b1.pdf [file c5tc02357b1.pdf]

# Supporting Information

## Efficient Multicolor and White Light Emission From Zr-Based MOF Composites: Spectral and Dynamical Properties

Mario Gutiérrez,<sup>1</sup> Félix Sánchez<sup>2</sup> and Abderrazzak Douhal<sup>1\*</sup>

<sup>1</sup>Departamento de Química Física, Facultad de Ciencias Ambientales y Bioquímica, and INAMOL, Universidad de Castilla-La Mancha, Avenida Carlos III, S.N., 45071 Toledo, Spain.

<sup>2</sup>Instituto de Química Orgánica, CSIC, Juan de la Cierva, 3, 28006 Madrid, Spain.

\*Corresponding author at Universidad de Castilla-La Mancha.

Tel.: +34 925 265 717; E-mail address: [abderrazzak.douhal@uclm.es](mailto:abderrazzak.douhal@uclm.es)

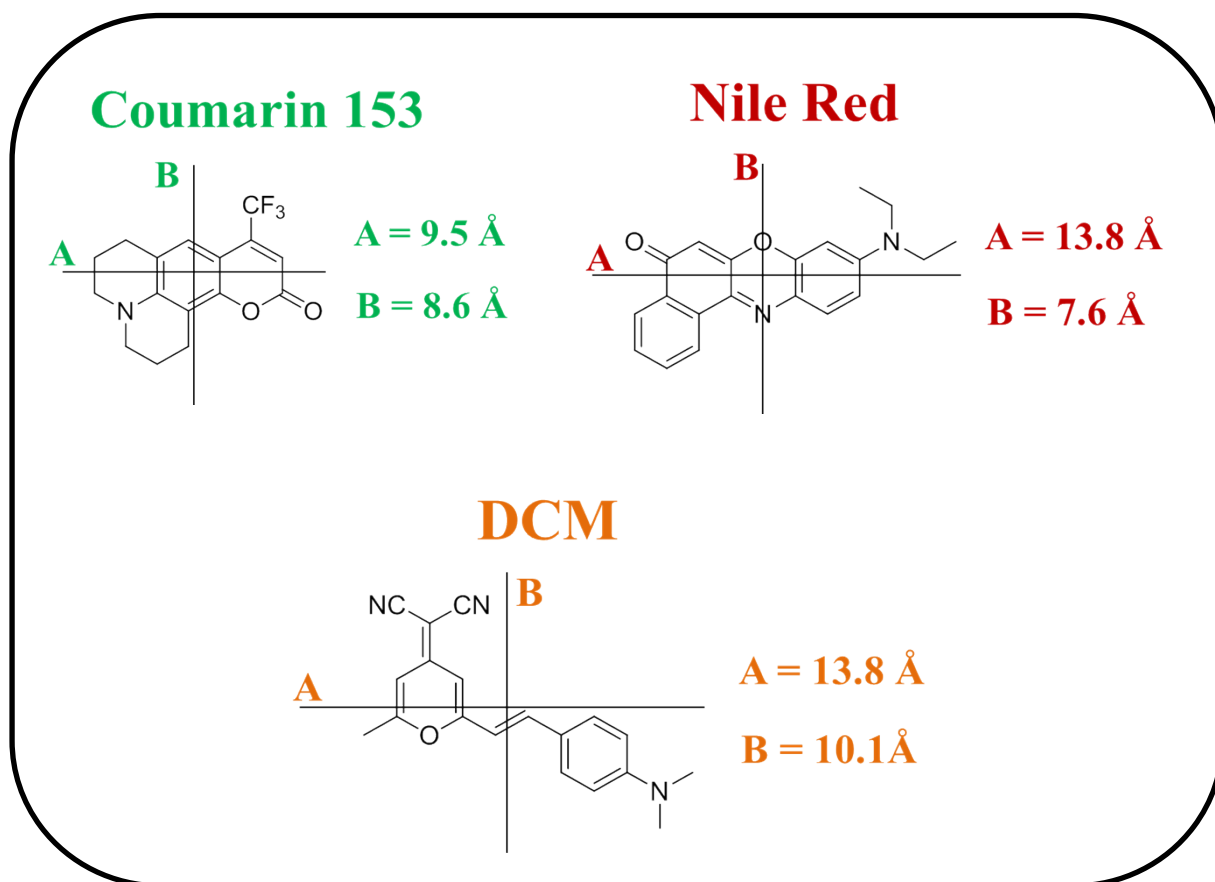

**Scheme S1.** Molecular structures of Coumarin 153 (C153), Nile Red (NR) and dye 4-(dicyanomethylene)-2-methyl-6-(4-dimethylaminostyryl)-4H-pyran (DCM) used in making the dye@Zr-NDC composited. The size of the molecules (in length and width) is presented as A and B axis.

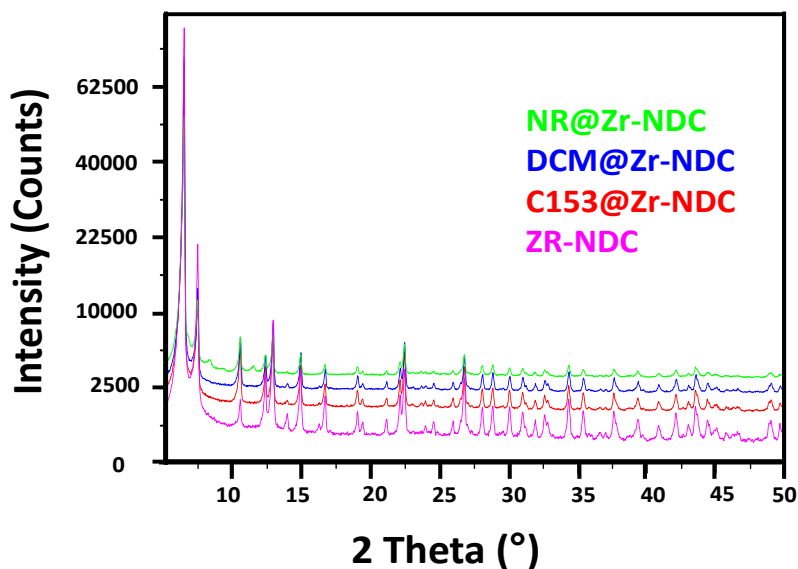

**Figure S1.** Powders X-rays diffraction patterns of Zr-NDC, C153@Zr-NDC, DCM@Zr-NDC and NR@Zr-NDC.

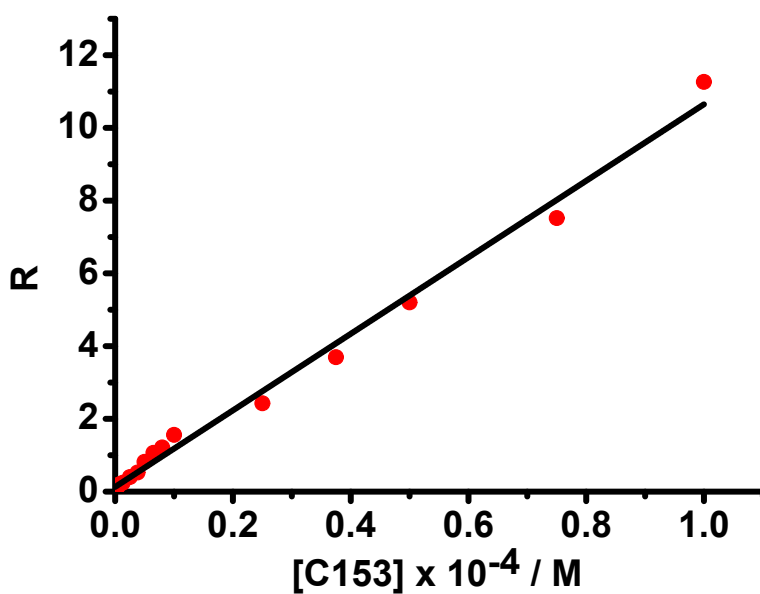

**Figure S2.** Representation of the relative emission intensities,  $R = \frac{\text{emission intensity of C153 at } 505 \text{ nm}}{\text{emission intensity of MOF at } 390 \text{ nm}}$ , versus the concentration of added C153.

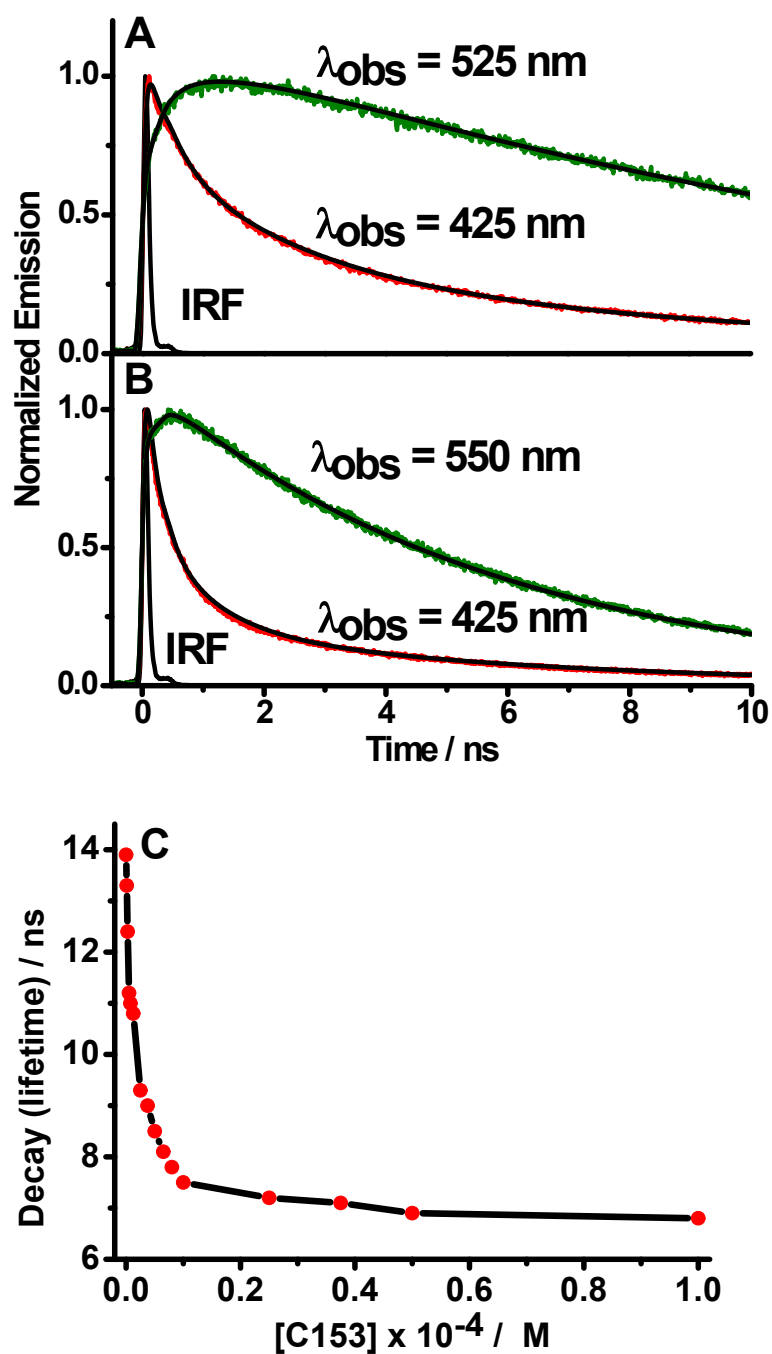

**Figure S3.** Emission decays of (A) Zr-NDC and (B) C153@Zr-NDC in DE suspensions. The observation wavelength is indicated as inset and the excitation was 371 nm. The solid lines are from the best-fit using a multiexponential function and the IRF is the instrumental response function. (C) Variation of the excimers emission lifetime with the amount of added C153 to a DE suspension of Zr-NDC.

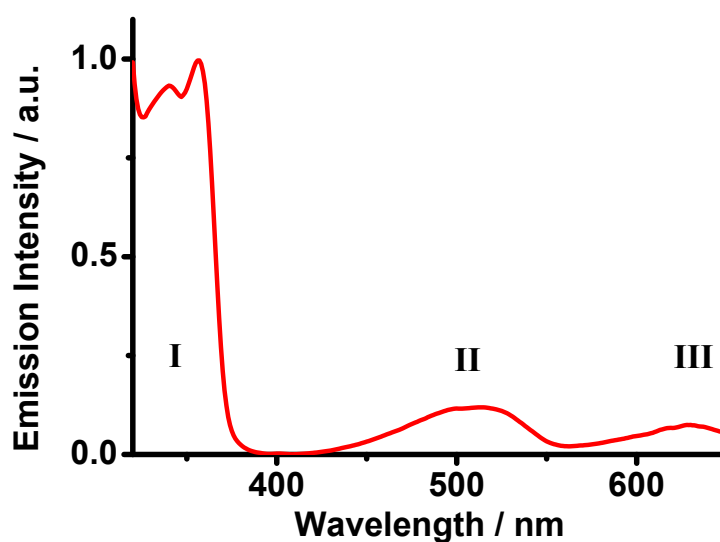

**Figure S4.** Excitation spectrum of NR@Zr-NDC in a DE suspension, recorded at 675 nm. Region I corresponds to the Zr-NDC absorption, while region II and III are those of absorption of the free and complexed NR, respectively.

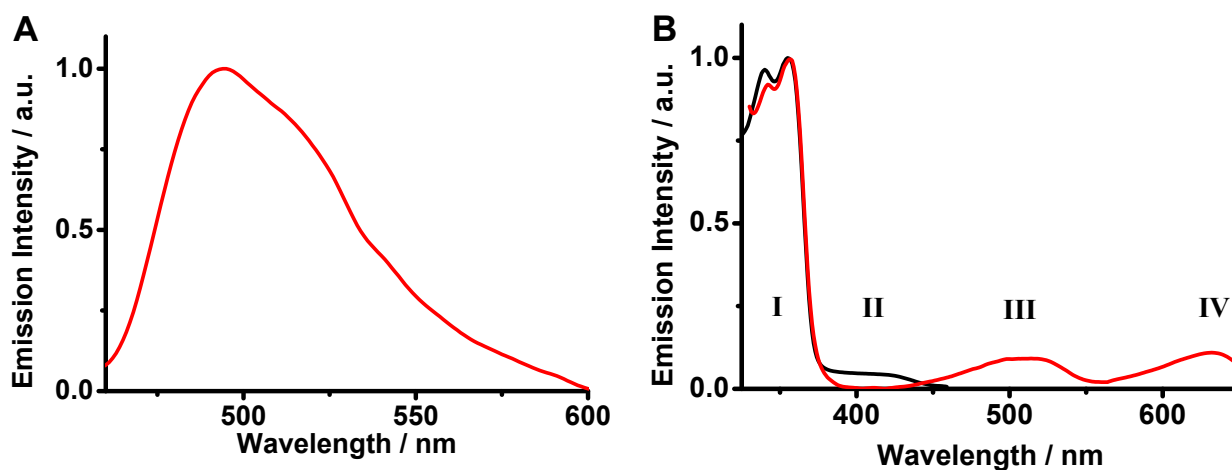

**Figure S5.** (A) Fluorescence spectrum of NR/C153@Zr-NDC in a DE suspension, upon excitation at 410 nm (C153 absorption region). (B) Normalized (to the maximum intensity) excitation spectra of NR/C153@Zr-NDC in a DE suspension. The observation wavelengths were 500 (black line) and 675 (red line) nm. Region I corresponds to the Zr-NDC absorption, Region II to the absorption of the interacting C153 and, region III and IV are those of free and complexed NR, respectively.

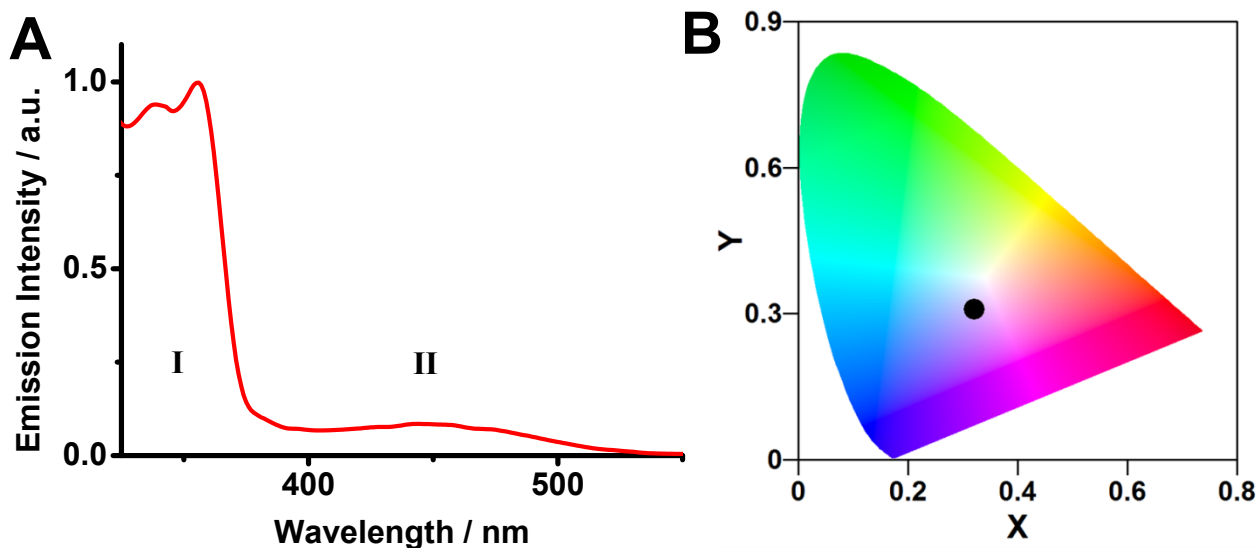

**Figure S6.** (A) Excitation spectrum of DCM@Zr-NDC in a DE suspension, gated at 625 nm. Region I corresponds to the Zr-NDC absorption, while region II is due to the absorption of DCM interacting with Zr-NDC. (B) CIE coordinates of DCM@Zr-NDC material in DE.

### Acknowledgments

This work was supported by the MINECO through projects MAT2011-25472, Consolider Ingenio 2010 (CSD2009-0050, MULTICAT), PRI-PIBIN-2011-1283 and MAT2014-52085-C2-2-P. We thank Dr. Jacinto Alonso Azcárate for making the X-rays experiments. M.G. thanks the MINECO for the Ph.D. Fellowship.
